# Supplementary material for: Novel Targets in a High-Altitude Pulmonary Hypertension Rat Model Based on RNA-seq and Proteomics
Source: Front Med (Lausanne). 2021 Nov 3;8:742436. doi: 10.3389/fmed.2021.742436 (PMC8595261; doi:10.3389/fmed.2021.742436)
Supplement: Supplementary file 3 [file Table_3.XLSX]

## Sheet: protein-green  module
Detailed informations enriched in the GO database by green modules based on proteomic
ID	Description	GeneRatio	BgRatio	pvalue	p.adjust	qvalue	geneID	Count
GO:0004363	glutathione synthase activity	1/33	1/16797	0.00196464	0.0336171	0.0250462	Gss	1
GO:0005178	integrin binding	3/33	100/16797	0.0009812	0.0215864	0.0160828	Lamb2/Itga6/Lama5	3
GO:0044822	poly(A) RNA binding	10/33	1191/16797	6.33756e-05	0.00243996	0.00181788	Mecp2/Rpl6/Rpl24/Serbp1/Hist1h1c/Hist1h1d/LOC684828/H1f0/Edf1/Rpl27a	10
GO:0065004	protein-DNA complex assembly	5/34	155/17421	1.1808e-05	0.00131423	0.00115843	Hist1h1a/Hist1h1c/Hist1h1d/LOC684828/H1f0	5
GO:0006323	DNA packaging	5/34	152/17421	1.07395e-05	0.00131423	0.00115843	Hist1h1a/Hist1h1c/Hist1h1d/LOC684828/H1f0	5
GO:0070734	histone H3-K27 methylation	3/34	21/17421	8.81885e-06	0.00122692	0.00108147	Hist1h1c/Hist1h1d/LOC684828	3
GO:0006333	chromatin assembly or disassembly	5/34	135/17421	6.02591e-06	0.00095812	0.000844534	Hist1h1a/Hist1h1c/Hist1h1d/LOC684828/H1f0	5
GO:0034728	nucleosome organization	5/34	122/17421	3.66852e-06	0.00068051	0.000599835	Hist1h1a/Hist1h1c/Hist1h1d/LOC684828/H1f0	5
GO:0051568	histone H3-K4 methylation	3/34	53/17421	0.000148841	0.0101871	0.00897941	Hist1h1c/Hist1h1d/LOC684828	3
GO:0031497	chromatin assembly	5/34	115/17421	2.74273e-06	0.000676979	0.000596723	Hist1h1a/Hist1h1c/Hist1h1d/LOC684828/H1f0	5
GO:0006334	nucleosome assembly	5/34	97/17421	1.18087e-06	0.000438103	0.000386165	Hist1h1a/Hist1h1c/Hist1h1d/LOC684828/H1f0	5
GO:0098532	histone H3-K27 trimethylation	3/34	9/17421	5.65975e-07	0.000314965	0.000277626	Hist1h1c/Hist1h1d/LOC684828	3
GO:0005719	nuclear euchromatin	4/37	31/18436	4.1548e-07	4.50795e-05	3.1489e-05	Hist1h1a/Hist1h1c/LOC684828/H1f0	4
GO:0016584	nucleosome positioning	3/34	8/17421	3.77821e-07	0.000314965	0.000277626	Hist1h1c/Hist1h1d/LOC684828	3
GO:0044420	extracellular matrix component	6/37	129/18436	2.03184e-07	4.4091e-05	3.07985e-05	Col1a1/Col4a2/Lamb2/Itga6/Nid1/Lama5	6
Green module represents sharing in the heart and lung.

## Sheet: protein-turquoise  module
Detailed informations enriched in the GO database by turquoise modules based on proteomic
ID	Description	GeneRatio	BgRatio	pvalue	p.adjust	qvalue	geneID	Count
rno01100	Metabolic pathways	61/123	1380/3599	0.0063945	0.164126	0.145839	Dcxr/Atp6v0a1/Oplah/Gls/Nme1/Acy1/Cad/Pgk1/Pdxp/Spr/Hmbs/Pnpo/Aldoa/Agpat3/Nme2/Gphn/Hk3/Nt5c2/Pfkl/Pkm/Mtm1/Inpp5a/Acox1/Paics/Acsl6/Pcyt1a/Galt/Tymp/Inpp1/Cpox/Gpt/Uap1/Atic/Qars/Gstz1/Eprs/Ppat/Dguok/Kyat1/Acaca/Sord/Auh/Ndufb2/Ephx2/Atp6v1g1/Pfkp/Gmps/Atp5e/Atp6v1a/Acss2/Inppl1/Sardh/Pmm2/Mri1/Pip4k2c/Acox3/Dhodh/Mocs2/Cox17/Gart/Gcsh	61
rno00051	Fructose and mannose metabolism	7/123	39/3599	0.000283965	0.0109326	0.00971458	Tigar/Aldoa/Hk3/Pfkl/Sord/Pfkp/Pmm2	7
rno03050	Proteasome	8/123	48/3599	0.000177306	0.0109326	0.00971458	Psmd4/Psmd8/Psmd2/Psmb5/Psmc4/Psmc6/Adrm1/Psmc1	8
GO:0043436	oxoacid metabolic process	44/335	775/17421	1.1681e-10	4.81142e-08	4.02565e-08	Tigar/Gls/Acy1/Cad/Prkaa1/Gars/Pgk1/Spr/Aldoa/Decr1/Abcd3/Hk3/Pfkl/Pkm/Iars/Acox1/Prkab1/Acsl6/Erlin1/Galt/Akt1/Gpt/Qars/Gstz1/Eprs/Pecr/Ppat/Kyat1/Acaca/Auh/Acot11/Ephx2/Pfkp/Gmps/Acss2/Sardh/Aimp1/Thnsl2/Mri1/Apoc2/Acox3/Gart/Mapk9/Gcsh	44
GO:0030163	protein catabolic process	43/335	744/17421	1.11026e-10	4.81142e-08	4.02565e-08	Gpx1/Acy1/Ubqln4/Ambp/Sdcbp/Ube2r2/Ide/Fhit/Ddrgk1/Get4/Mtm1/Ubxn4/Faf2/Vps28/Anks1a/Psmd4/Erlin1/Vps4a/Sec22b/Usp14/Akt1/Uchl3/Psmd8/Psmd2/Sco1/Ubqln2/Psmb5/Stub1/Psmc4/Usp9x/Htra2/Usp15/Ctsl/Psmc6/Nploc4/Dnajb2/Ddb1/Vps36/Rbx1/Nrdc/Snf8/Arih1/Psmc1	43
GO:0019752	carboxylic acid metabolic process	44/335	771/17421	9.89449e-11	4.81142e-08	4.02565e-08	Tigar/Gls/Acy1/Cad/Prkaa1/Gars/Pgk1/Spr/Aldoa/Decr1/Abcd3/Hk3/Pfkl/Pkm/Iars/Acox1/Prkab1/Acsl6/Erlin1/Galt/Akt1/Gpt/Qars/Gstz1/Eprs/Pecr/Ppat/Kyat1/Acaca/Auh/Acot11/Ephx2/Pfkp/Gmps/Acss2/Sardh/Aimp1/Thnsl2/Mri1/Apoc2/Acox3/Gart/Mapk9/Gcsh	44
GO:0044237	cellular metabolic process	238/335	9320/17421	2.57089e-11	1.51279e-08	1.26573e-08	Dcxr/Gpx1/Tigar/Cops2/Slirp/Gpd1l/Atp6v0a1/Mapkapk2/Itga5/Oplah/Lamtor3/Gls/Nme1/Acy1/Cad/Lsm1/Tfrc/Prkaa1/Gars/Fn3k/Pgk1/Pdxp/Ubqln4/Ppm1a/Spr/Ambp/Sdcbp/Ube2r2/Hmbs/Pnpo/Lactb2/Nubp1/Aldoa/Akap1/Retsat/Ide/Nme2/Uba5/Decr1/Rexo2/Gphn/Ndufaf2/Strn3/Abcd3/Ndrg4/Hk3/Abcf1/Nt5c2/Fhit/Ddrgk1/Pxdn/Pfkl/Pkm/Mcts1/Iars/Eny2/Mtm1/Tmx3/Rtcd1/Wbp2/Esd/Inpp5a/Acox1/Nfib/Ubxn4/Faf2/Vps28/Nqo2/Prkab1/Eif4g1/P…	238
GO:0005515	protein binding	193/334	6456/16797	3.96487e-13	1.79014e-10	1.30841e-10	Gpx1/Nefl/Cops2/Gpd1l/Atp6v0a1/Mapkapk2/Itga5/Lamtor3/Gls/Naxe/Nme1/Cad/Tfrc/Prkaa1/Map1lc3a/Gars/Pdxp/Ubqln4/Ppm1a/Spr/Ambp/Sdcbp/Ube2r2/Hmbs/Enah/Aldoa/Akap1/Ide/Nme2/Des/Gphn/Strn3/Myo18a/Abcd3/Flnc/Hk3/Fhit/Ddrgk1/Ptrh2/Sntb1/Pfkl/Pkm/Get4/Vwa1/Iars/Mtm1/Wbp2/Inpp5a/Tor1aip1/Acox1/Tmem88/Svil/Faf2/Vps28/Prkab1/Eif4g1/Paics/Anks1a/Fblim1/Clip1/Elp3/Pebp1/Chordc1/Acsl6/Psmd4/Erlin1/Msrb2/Pcyt1a…	193
GO:0003824	catalytic activity	177/334	5596/16797	6.25976e-14	5.65256e-11	4.13144e-11	Dcxr/Gpx1/L3hypdh/Tigar/Gpd1l/Atp6v0a1/Mapkapk2/Oplah/Gls/Naxe/Nme1/Acy1/Cad/Prkaa1/Gars/Fn3k/Pgk1/Pdxp/Ppm1a/Spr/Ube2r2/Hmbs/Pnpo/Lactb2/Aldoa/Akap1/Retsat/Ide/Agpat3/Nme2/Uba5/Decr1/Rexo2/Gphn/Ndufaf2/Myo18a/Abcd3/Hk3/Abcf1/Nt5c2/Fhit/Pxdn/Ptrh2/Pfkl/Pkm/Iars/Mtm1/Prepl/Tmx3/Rtcd1/Esd/Inpp5a/Acox1/Steap4/Nqo2/Prkab1/Paics/Metap2/Elp3/Acsl6/LOC100910481/Msrb2/Pcyt1a/Nudt13/Ube2m/Vps4a/Fdx1/Galt/…	177
GO:0044710	single-organism metabolic process	130/335	3652/17421	4.15189e-14	4.27541e-11	3.57718e-11	Dcxr/Gpx1/Tigar/Gpd1l/Atp6v0a1/Mapkapk2/Lamtor3/Gls/Nme1/Acy1/Cad/Tfrc/Prkaa1/Gars/Pgk1/Spr/Sdcbp/Hmbs/Pnpo/Aldoa/Retsat/Nme2/Decr1/Gphn/Ndufaf2/Abcd3/Ndrg4/Hk3/Nt5c2/Fhit/Pxdn/Pfkl/Pkm/Get4/Iars/Mtm1/Tmx3/Esd/Inpp5a/Acox1/Steap4/Ubxn4/Faf2/Nqo2/Prkab1/Paics/Pebp1/Acsl6/Erlin1/Msrb2/Pcyt1a/Apoh/Fdx1/Galt/Tymp/Aldh16a1/Inpp1/Usp14/Cpox/Akt1/Gpt/Epm2aip1/Stk39/Atic/Qars/Flot1/Oxr1/Ubqln2/Gstz1/Itga…	130
GO:0044248	cellular catabolic process	72/335	1318/17421	3.04731e-16	4.18396e-13	3.50067e-13	Gpx1/Tigar/Slirp/Gls/Acy1/Lsm1/Prkaa1/Pdxp/Ubqln4/Sdcbp/Ube2r2/Ide/Decr1/Abcd3/Fhit/Ddrgk1/Pxdn/Mtm1/Esd/Acox1/Ubxn4/Faf2/Vps28/Anks1a/Psmd4/Erlin1/Apoh/Vps4a/Galt/Usp14/Akt1/Gpt/Uchl3/Psmd8/Psmd2/Sco1/Pelo/Ubqln2/Psmb5/Gstz1/Stub1/Psmc4/Usp9x/Htra2/Usp15/Ppat/Ctsl/Kyat1/Psmc6/Sord/Auh/Npepps/Lsm4/Nploc4/Rnpep/Dnajb2/Sh3glb1/Ephx2/Ppp1cb/Cryz/Ddb1/Vps36/Rbx1/Thnsl2/Pnpt1/Nrdc/Snf8/Apoc2/Acox3/Ari…	72
GO:1901575	organic substance catabolic process	83/335	1565/17421	5.0851e-18	1.04728e-14	8.76244e-15	Gpx1/Tigar/Slirp/Gpd1l/Gls/Acy1/Lsm1/Prkaa1/Pgk1/Pdxp/Ubqln4/Ambp/Sdcbp/Ube2r2/Aldoa/Ide/Decr1/Abcd3/Hk3/Fhit/Ddrgk1/Pfkl/Pkm/Get4/Mtm1/Esd/Acox1/Ubxn4/Faf2/Vps28/Anks1a/Psmd4/Erlin1/Apoh/Vps4a/Galt/Inpp1/Sec22b/Usp14/Akt1/Gpt/Uchl3/Psmd8/Psmd2/Sco1/Pelo/Ubqln2/Psmb5/Gstz1/Stub1/Psmc4/Usp9x/Htra2/Usp15/Ppat/Ctsl/Kyat1/Psmc6/Sord/Auh/Npepps/Lsm4/Nploc4/Rnpep/Dnajb2/Sh3glb1/Ephx2/Pfkp/Ppp1cb/Ddb1/V…	83
GO:0009056	catabolic process	86/335	1629/17421	1.39937e-18	5.76401e-15	4.82268e-15	Gpx1/Tigar/Slirp/Gpd1l/Gls/Acy1/Lsm1/Prkaa1/Pgk1/Pdxp/Ubqln4/Ambp/Sdcbp/Ube2r2/Aldoa/Ide/Decr1/Abcd3/Hk3/Fhit/Ddrgk1/Pxdn/Pfkl/Pkm/Get4/Mtm1/Esd/Acox1/Ubxn4/Faf2/Vps28/Anks1a/Psmd4/Erlin1/Apoh/Vps4a/Galt/Inpp1/Sec22b/Usp14/Akt1/Gpt/Uchl3/Psmd8/Psmd2/Sco1/Pelo/Ubqln2/Psmb5/Gstz1/Stub1/Psmc4/Usp9x/Htra2/Usp15/Ppat/Ctsl/Kyat1/Psmc6/Sord/Auh/Npepps/Lsm4/Nploc4/Rnpep/Pter/Dnajb2/Sh3glb1/Ephx2/Pfkp/Ppp…	86
GO:0044444	cytoplasmic part	251/357	6763/18436	9.66929e-39	2.80409e-36	2.06617e-36	Dcxr/Gpx1/Tigar/Nefl/Slirp/Gpd1l/Atp6v0a1/Itga5/Oplah/Lamtor3/Gls/Naxe/Slc44a2/Nme1/Cad/Lsm1/Tfrc/Map1lc3a/Gars/Pgk1/Pdxp/Mrps35/Ubqln4/Ppm1a/Phldb1/Spr/Sdcbp/Lactb2/Hspa4l/Nubp1/Aldoa/Akap1/Retsat/Ide/Agpat3/Nme2/Des/Uba5/Decr1/Rexo2/Ndufaf2/LOC690000/Strn3/Myo18a/Abcd3/Flnc/Myg1/Ndrg4/Hk3/Abcf1/Fhit/Ddrgk1/Pxdn/Plin2/Ptrh2/Pfkl/Pkm/Get4/Mcts1/Iars/Bola1/Mtm1/Prepl/Tmx3/Esd/Ckap4/Cmc2/Acox1/Tmem…	251
GO:0005737	cytoplasm	311/357	9552/18436	1.90859e-46	1.10698e-43	8.1567e-44	Dcxr/Gpx1/Tigar/Nefl/Cops2/Slirp/Gpd1l/Atp6v0a1/Mapkapk2/Itga5/Oplah/Lamtor3/Gls/Naxe/Slc44a2/Nme1/Acy1/Cad/Lsm1/Tfrc/Prkaa1/Map1lc3a/Cdv3/Gars/Pgk1/Pdxp/Mrps35/Ubqln4/Ppm1a/Phldb1/Spr/Sdcbp/Ube2r2/Hmbs/Pnpo/Enah/Lactb2/Hspa4l/Nubp1/Aldoa/Akap1/Retsat/Ide/Agpat3/Nme2/Des/Uba5/Decr1/Rexo2/Gphn/Ndufaf2/LOC690000/Strn3/Myo18a/Abcd3/Flnc/Myg1/Ndrg4/Hk3/Abcf1/Fhit/Actr1b/Ddrgk1/Pxdn/Plin2/Ptrh2/Pfkl/P…	311
Turquoise module represents unique in heart.

## Sheet: protein-yellow  module
Detailed informations enriched in the GO database by yellow modules based on proteomic
ID	Description	GeneRatio	BgRatio	pvalue	p.adjust	qvalue	geneID	Count
GO:0050658	RNA transport	6/471	103/17421	0.0606111	0.236813	0.195674	Tpr/Pabpn1/Tst/Nup35/Rps28/Ncbp1	6
rno03050	Proteasome	10/152	48/3599	2.20155e-05	0.000836588	0.000811097	Psmb1/Psmc3/Psmb4/Psmb9/Psmd1/Psmd6/Psmb8/Psmf1/Psmd14/Psme3	10
GO:0071010	prespliceosome	6/492	23/18436	2.40305e-05	0.000263243	0.00017745	Lsm7/U2af2/Sf3a2/Luc7l3/Snrpd1/Snrpc	6
GO:0006508	proteolysis	88/471	1613/17421	1.068e-10	8.03896e-08	6.64246e-08	Hp/Serpina3n/Agt/Apoe/Serping1/LOC297568/Mug2/Isg15/Mug1/Fga/Itih4/Fgg/Aga/Serpina1/Serpind1/Serpinf1/Fgb/C3/Dab2/S100a8/Trim25/Psmb1/Psmc3/Anp32b/Ccdc47/Ufl1/Psmb4/Ube2h/Ctss/Park7/Fbln1/Renbp/Stat3/Skp1/Fgl2/Nsfl1c/Cops7b/Tsg101/Pcyox1/Ctsc/Dnpep/Ube2n/Ap1s1/Pdcd6/Cops5/Csnk2a1/Vps4b/Psmb9/Tpsab1/App/Tnfaip8/Psmd1/Trim21/Nedd4/Psmd6/Cd44/Cfh/Enpep/Ube2k/Psmb8/Dpp7/Ahsg/Clec3b/Psmf1/Uba6/Pcnp/Kn…	88
GO:0030162	regulation of proteolysis	50/471	662/17421	5.13871e-11	4.51264e-08	3.72872e-08	Serpina3n/Agt/Apoe/Serping1/LOC297568/Mug2/Mug1/Itih4/Serpina1/Serpind1/Serpinf1/C3/Dab2/S100a8/Psmc3/Anp32b/Ufl1/Park7/Fbln1/Renbp/Stat3/Ctsc/Pdcd6/Csnk2a1/Psmb9/App/Tnfaip8/Trim21/Cd44/Cfh/Ube2k/Psmb8/Ahsg/Clec3b/Psmf1/Kng2/Kng1/Serpina3c/Uaca/C4b/C4a/Pycard/Uchl5/Vtn/Psmd14/Ccar2/Ccdc22/Cr1l/LOC299282/Psme3	50
GO:0034622	cellular macromolecular complex assembly	60/471	867/17421	1.92573e-11	2.02933e-08	1.6768e-08	Alox15/Fga/Fgg/Fgb/Rab1a/Eif2s3/Dab2/Wasl/Psip1/Psmc3/Arfip1/Rtn4/Arpc1a/Sec24b/Anp32b/Eml2/Prpf6/Snap23/Prkcd/Cdc42ep1/Sbds/Capg/Sf3a2/Eif3i/Luc7l3/Tnpo1/Tppp/Rps2/Smarca5/Add2/Chmp2a/Myadm/Strap/Celf1/Eif3a/Exoc8/Celf2/Cav3/Ube2k/Pde4d/Eif2ak2/Eif4h/Eps15/Mbnl1/Cenpv/Cttn/Exoc2/Snrpd1/Cyfip1/Pycard/Vtn/Nck1/Evl/Ap2b1/Napa/Snrpc/Cct2/Cand1/Nck2/Srsf10	60
GO:0065003	macromolecular complex assembly	88/471	1507/17421	2.86825e-12	3.77821e-09	3.12187e-09	Apoc3/Apoe/Alox15/Fga/Fgg/Grhpr/Ctnna1/Fgb/Rab1a/Alad/Eif2s3/Tpr/Hba1/Dab2/Slc4a1/Hba2/Wasl/Psip1/Psmc3/Arfip1/Rtn4/Arpc1a/Sec24b/Impdh2/Anp32b/Eml2/Prpf6/Apoa4/Txnrd1/Snap23/Mcu/Prkcd/Cdc42ep1/Sbds/Capg/Hck/Glul/Sf3a2/Eif3i/Luc7l3/Tnpo1/Tppp/Rps2/Smarca5/Hbb/Add2/Chmp2a/Myadm/Strap/St13/Farsa/Celf1/Eif3a/Exoc8/Entpd1/Celf2/Cav3/Trim21/Ube2k/Pde4d/Eif2ak2/Ahsg/Eif4h/Me1/Eps15/Mbnl1/Cenpv/Cttn/Exo…	88
GO:0044085	cellular component biogenesis	131/471	2587/17421	1.49755e-13	3.9453e-10	3.25994e-10	Agt/Apoc3/Apoe/Alox15/Fga/Fgg/Grhpr/Ctnna1/Fgb/Rcc1/Podxl/Rab1a/Alad/Eif2s3/Tpr/Hba1/Map4/Rala/Dab2/Slc4a1/Hba2/Wasl/Psip1/Abce1/Psmc3/Arfip1/Rtn4/Arpc1a/Tst/Sec24b/Wdr45b/Mvb12a/Wasf2/Impdh2/Anp32b/Eml2/Prpf6/Apoa4/Txnrd1/Snap23/Mcu/Prkcd/Cdc42ep1/Sbds/Capg/Hck/Glul/Tsg101/Sf3a2/Eif3i/Chmp5/Luc7l3/Tnpo1/Rps28/Tppp/Rab8a/Rps24/Rps2/Smarca5/Hbb/Golph3/Add2/Chmp2a/Myadm/Strap/Pkn2/St13/Farsa/Celf1/…	131
GO:0022607	cellular component assembly	122/471	2362/17421	3.63405e-13	6.38261e-10	5.27384e-10	Agt/Apoc3/Apoe/Alox15/Fga/Fgg/Grhpr/Ctnna1/Fgb/Rcc1/Podxl/Rab1a/Alad/Eif2s3/Tpr/Hba1/Map4/Rala/Dab2/Slc4a1/Hba2/Wasl/Psip1/Psmc3/Arfip1/Rtn4/Arpc1a/Tst/Sec24b/Wdr45b/Mvb12a/Wasf2/Impdh2/Anp32b/Eml2/Prpf6/Apoa4/Txnrd1/Snap23/Mcu/Prkcd/Cdc42ep1/Sbds/Capg/Hck/Glul/Tsg101/Sf3a2/Eif3i/Chmp5/Luc7l3/Tnpo1/Tppp/Rab8a/Rps2/Smarca5/Hbb/Golph3/Add2/Chmp2a/Myadm/Strap/Pkn2/St13/Farsa/Celf1/Chmp1a/Lima1/Nptn/…	122
GO:0005515	protein binding	264/454	6456/16797	5.7768e-18	2.80175e-15	2.15566e-15	Hp/Agt/Apoc3/Apoe/Serping1/Gc/Thrap3/Ckb/Ube2o/Glrx/Gnas/Fga/Dusp3/Cbx1/Fgg/Aga/Grhpr/Serpina1/Ranbp2/Ctnna1/Fgb/Rcc1/Podxl/Alad/Eif2s3/Tpr/Hba1/Map4/Rala/Ank1/C3/Dab2/Slc4a1/Hba2/S100a8/Eno1/Wasl/Cspg4/Prkra/Psip1/Ppp1r12a/Naga/Crk/S100a13/Psmc3/Plcb3/Arfip1/Rtn4/Arpc1a/Tsnax/Mvb12a/Wasf2/Prmt1/Bicd2/Anp32b/Eml2/Prpf6/U2af2/Apoa4/Rabep2/Pon1/Txnrd1/Triobp/Emd/Dctn2/Fkbp5/Gatad2b/Pafah1b3/Snap23/…	264
GO:0016192	vesicle-mediated transport	85/471	1136/17421	5.00199e-18	2.63555e-14	2.17771e-14	Apoc3/Apoe/Ube2o/Glrx/Alox15/Fga/Fgg/Fgb/Rab1a/Rala/Ank1/C3/Dab2/Ergic1/Wasl/Copz1/Plcb3/Sec24b/Mvb12a/Wasf2/Rabep2/Snap23/Trip10/Lman2/Hck/Lgals3bp/Tsg101/Chmp5/Sh3gl1/Rab8a/Arl3/Ap1s1/Canx/Golph3/Cops5/Chmp2a/Rab9a/Chmp1a/Pacs1/Rab8b/Epn1/Vps4b/Rtn3/Snx1/Ap3s1/Exoc8/App/Atad1/Vps29/Arcn1/Cav3/Nedd4/Snx18/Rab2a/Rab35/Copb1/Ahsg/Necap2/Ap3b1/Erc1/Eps15/Dnm2/Hook3/Cttn/Rabgap1/Exoc2/Rer1/C4b/Exoc4…	85
GO:0044822	poly(A) RNA binding	95/454	1191/16797	3.12201e-22	3.02835e-19	2.33001e-19	Thrap3/Ube2o/Dhx15/Ctnna1/Rpl19/Tpr/Map4/Pabpn1/Eno1/Trim25/Prkra/Psip1/G3bp1/Eif1/Srsf4/Rtn4/Tsnax/Prmt1/Sf3b6/Ccdc47/Prpf6/U2af2/Tra2a/Eif3l/Ubtf/Ilf3/Rpn1/Park7/Sbds/Ddx46/RGD1304704/Sf3a2/Hnrnpdl/Luc7l3/Tnpo1/Rps28/Hnrnpr/Ube2n/Tpd52l2/Rps24/Rps2/Canx/Ybx2/Syncrip/Slc3a2/Ddx23/Eif4a2/Strap/Pkn2/Smc1a/Matr3/Farsa/Celf1/Rps16/Myef2/Rbm25l1/Eif4e/Eif3a/Carhsp1/Snd1/Tsn/Sntb2/Rpl7/Dcn/Zfp207/Celf…	95
GO:1903561	extracellular vesicle	208/492	2654/18436	1.24231e-52	2.99396e-50	2.0182e-50	Hp/Agt/Apoc3/Apoe/Serping1/Gc/Mug1/Orm1/Thrap3/Ckb/Glrx/Oxsr1/Gnas/Fga/Dusp3/Itih4/C9/Fgg/Aga/Grhpr/Serpina1/Serpind1/Serpinf1/Fgb/Podxl/Rab1a/Alad/Eif2s3/Hba1/Map4/Rala/Rbks/C3/Dab2/Slc4a1/Hba2/S100a8/Eno1/Wasl/Hpx/Cspg4/Hspa12a/Psmb1/Bst1/Aldh3a2/Naga/Hebp1/Crk/S100a13/Rtn4/Arpc1a/Tst/Mvb12a/Wasf2/Impdh2/Anp32b/Apoa4/Pon1/Txnrd1/Pitpna/Dctn2/Fkbp5/Pafah1b3/Snap23/Psmb4/Itm2b/Trip10/Glod4/Pitpnb…	208
GO:0070062	extracellular exosome	208/492	2640/18436	5.08525e-53	1.83832e-50	1.23919e-50	Hp/Agt/Apoc3/Apoe/Serping1/Gc/Mug1/Orm1/Thrap3/Ckb/Glrx/Oxsr1/Gnas/Fga/Dusp3/Itih4/C9/Fgg/Aga/Grhpr/Serpina1/Serpind1/Serpinf1/Fgb/Podxl/Rab1a/Alad/Eif2s3/Hba1/Map4/Rala/Rbks/C3/Dab2/Slc4a1/Hba2/S100a8/Eno1/Wasl/Hpx/Cspg4/Hspa12a/Psmb1/Bst1/Aldh3a2/Naga/Hebp1/Crk/S100a13/Rtn4/Arpc1a/Tst/Mvb12a/Wasf2/Impdh2/Anp32b/Apoa4/Pon1/Txnrd1/Pitpna/Dctn2/Fkbp5/Pafah1b3/Snap23/Psmb4/Itm2b/Trip10/Glod4/Pitpnb…	208
GO:0043230	extracellular organelle	209/492	2659/18436	3.65936e-53	1.83832e-50	1.23919e-50	Hp/Agt/Apoc3/Apoe/Serping1/Gc/Mug1/Orm1/Thrap3/Ckb/Glrx/Oxsr1/Gnas/Fga/Dusp3/Itih4/C9/Fgg/Aga/Grhpr/Serpina1/Serpind1/Serpinf1/Fgb/Podxl/Rab1a/Alad/Eif2s3/Hba1/Map4/Rala/Rbks/C3/Dab2/Slc4a1/Hba2/S100a8/Eno1/Wasl/Hpx/Cspg4/Hspa12a/Psmb1/Bst1/Aldh3a2/Naga/Hebp1/Crk/S100a13/Rtn4/Arpc1a/Tst/Mvb12a/Wasf2/Impdh2/Anp32b/Apoa4/Pon1/Txnrd1/Pitpna/Dctn2/Fkbp5/Pafah1b3/Snap23/Psmb4/Itm2b/Trip10/Glod4/Pitpnb…	209
Yellow module represents unique in lung
